# Supplementary material for: Deriving fibroblast cell lines from wing-punch biopsies of Australian eastern bent-winged bats (Miniopterus orianae oceanensis)
Source: PeerJ. 2025 Oct 23;13:e20222. doi: 10.7717/peerj.20222 (PMC12554304; doi:10.7717/peerj.20222)
Supplement: Supplemental Information 1 — Growth data from all explants collected and grown during the course of the experiment. This data was used for statistical analysis to compare the effects of different storage, plating, and processing treatments. [file peerj-13-20222-s001.xlsx]

## Sheet: Sheet1
BatID	ID	Species	Date	Sex	Age	Weight	Forearm length	Storage	Plating	Growth	No. of times digested	Agitated	First growth (hrs)	Confluence (hrs)
29	29	EBWB	2024-02-19	f	a	15.1	48.3	Frz	Explant	0	n/a	n/a	n/a	n/a
30	30	EBWB	2024-02-19	f	a	15.3	49	Frz	Digested	0	1	n/a	n/a	n/a
31	31	EBWB	2024-02-19	f	a	14.3	48.8	Frz	Digested	0	1	n/a	n/a	n/a
32	32	EBWB	2024-02-19	m	a	14.4	48.2	Frz	Explant	0	n/a	n/a	n/a	n/a
33	33	EBWB	2024-02-19	f	a	14.7	48	Frz	Explant	0	n/a	n/a	n/a	n/a
34	34	EBWB	2024-02-19	m	a	14.7	49	Frz	Digested	0	1	n/a	n/a	n/a
35	35	EBWB	2024-02-19	m	a	14.6	48.3	Frz	Explant	0	n/a	n/a	n/a	n/a
36	36	EBWB	2024-02-19	m	a	15.3	48.3	Frz	Digested	0	1	n/a	n/a	n/a
37	37	EBWB	2024-02-19	m	a	14.6	48.6	Frz	Digested	0	1	n/a	n/a	n/a
38	38	EBWB	2024-02-19	f	a	14.2	48.7	Frz	Explant	0	n/a	n/a	n/a	n/a
39	39	EBWB	2024-02-19	f	a	14.6	48.8	PBS	Explant	0	n/a	n/a	n/a	n/a
40	40	EBWB	2024-02-19	f	a	14.3	49.4	PBS	Digested	1	1	no	60	392
41	41	EBWB	2024-02-19	f	a	15	48	PBS	Digested	1	1	no	72	360
42	42	EBWB	2024-02-19	f	a	14.4	48.8	PBS	Digested	1	1	no	48	392
43	43	EBWB	2024-02-19	m	a	14.2	48.1	PBS	Digested	0	1	no	n/a	n/a
44	44	EBWB	2024-02-19	m	a	15	48.3	PBS	Explant	0	n/a	n/a	n/a	n/a
45	45	EBWB	2024-02-19	f	a	15.7	49.8	PBS	Digested	1	1	no	48	392
46	46	EBWB	2024-02-19	m	a	13.8	48.1	PBS	Explant	0	n/a	n/a	n/a	n/a
47	47	EBWB	2024-02-19	m	a	14.6	49.6	PBS	Explant	0	n/a	n/a	n/a	n/a
48	48	EBWB	2024-02-19	m	a	13.4	47.8	PBS	Explant	0	n/a	n/a	n/a	n/a
40-1	40	EBWB	2024-02-19	f	a	14.3	49.4	PBS	Digested	1	1	yes	48	392
41-1	41	EBWB	2024-02-19	f	a	15	48	PBS	Digested	1	1	yes	24	360
42-1	42	EBWB	2024-02-19	f	a	14.4	48.8	PBS	Digested	1	1	yes	24	288
43-1	43	EBWB	2024-02-19	m	a	14.2	48.1	PBS	Digested	0	1	yes	n/a	n/a
45-1	45	EBWB	2024-02-19	f	a	15.7	49.8	PBS	Digested	1	1	yes	48	360
40-2	40	EBWB	2024-02-19	f	a	14.3	49.4	PBS	Digested	1	2	no	48	264
41-2	41	EBWB	2024-02-19	f	a	15	48	PBS	Digested	1	2	no	24	264
42-2	42	EBWB	2024-02-19	f	a	14.4	48.8	PBS	Digested	1	2	no	48	120
43-2	43	EBWB	2024-02-19	m	a	14.2	48.1	PBS	Digested	0	2	no	n/a	n/a
45-2	45	EBWB	2024-02-19	f	a	15.7	49.8	PBS	Digested	1	2	no	48	264
